# Supplementary material for: Construction of mesoporous Cu-doped Co9S8 rectangular nanotube arrays for high energy density all-solid-state asymmetric supercapacitors
Source: Royal Society of Chemistry journal article supplement (doi:10.1039/c8ta10998b), 2019-01-01
Supplement: c8ta10998b1.pdf [file c8ta10998b1.pdf]

## ESI:

### **Construction of mesoporous Cu-doped Co<sub>9</sub>S<sub>8</sub> rectangular nanotube arrays for high energy density all-solid-state asymmetric supercapacitors**

Wen Lu,<sup>a</sup> Ze Yuan,<sup>a</sup> Chunyang Xu,<sup>a</sup> Jiqiang Ning,<sup>b</sup> Yijun Zhong,<sup>a</sup> Ziyang Zhang<sup>b</sup> and Yong Hu<sup>\*a</sup>

<sup>a</sup>Key Laboratory of the Ministry of Education for Advanced Catalysis Materials, Department of Chemistry, Zhejiang Normal University, Jinhua 321004, China.

\*E-mail: [yonghu@zjnu.edu.cn](mailto:yonghu@zjnu.edu.cn); [yonghuzjnu@163.com](mailto:yonghuzjnu@163.com)

<sup>b</sup>Vacuum Interconnected Nanotech Workstation, Suzhou Institute of Nano-Tech and Nano-Bionics, Chinese Academy of Sciences, Suzhou 215123, China.

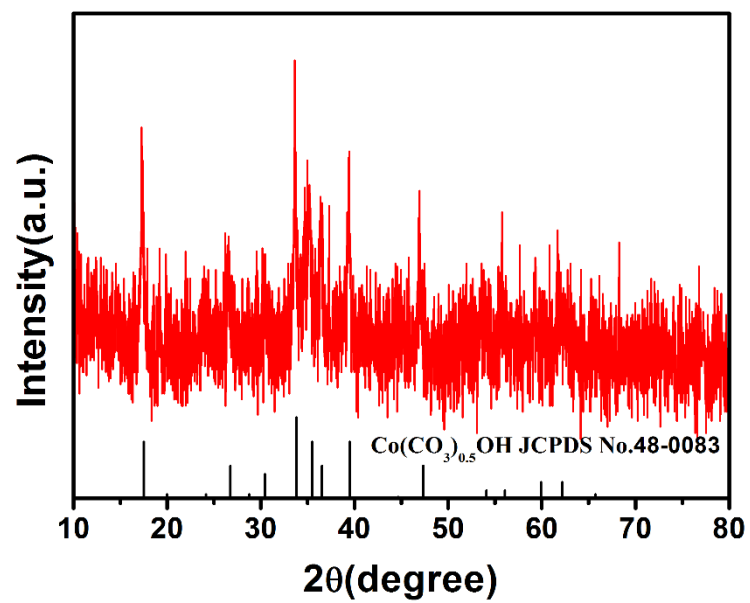

Fig. S1 XRD pattern of the as-prepared Cu-CCO NWAs.

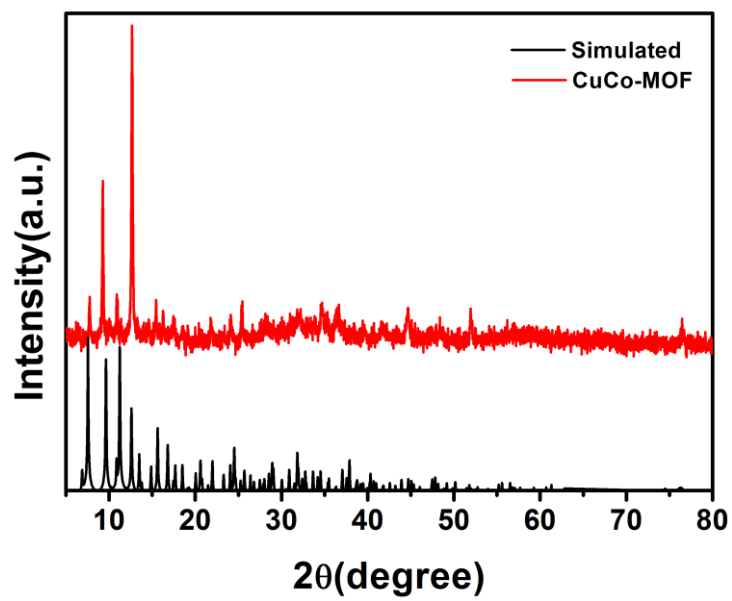

Fig. S2 XRD pattern of the as-prepared CuCo-MOF NRAs.

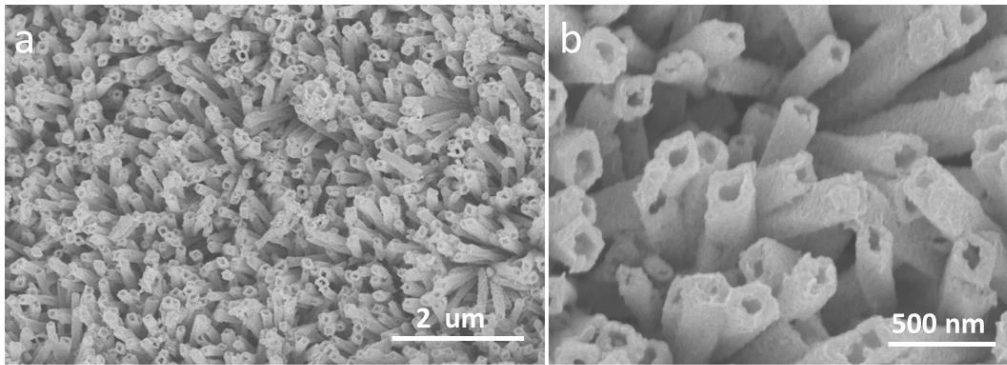

**Fig. S3** (a, b) SEM images of the as-prepared  $\text{Co}_9\text{S}_8$  rectangular NTAs.

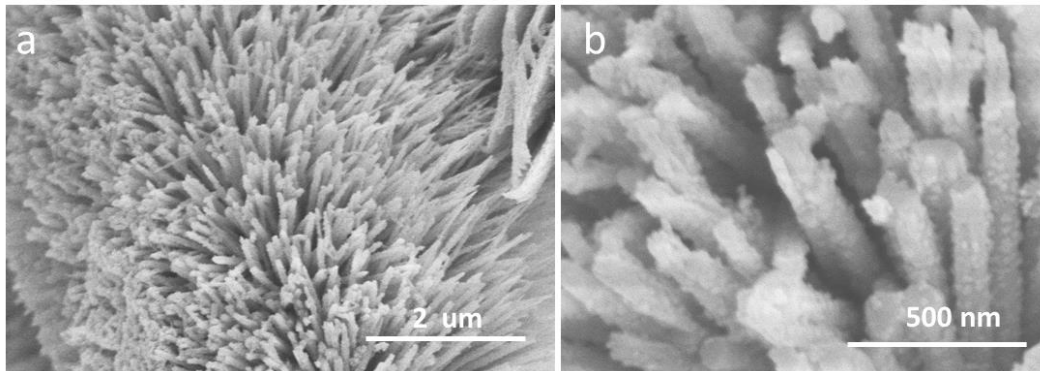

**Fig. S4** (a, b) SEM images of the as-prepared Cu-Co<sub>9</sub>S<sub>8</sub> NRAs.

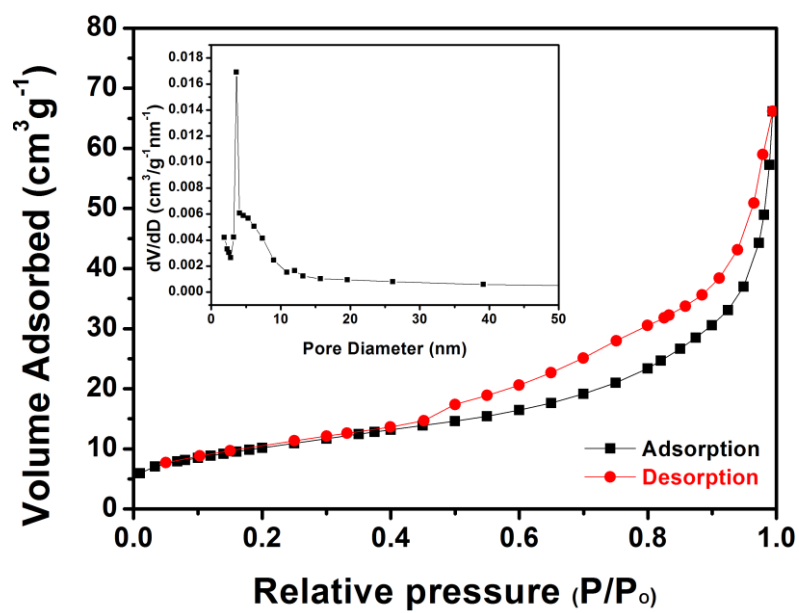

**Fig. S5** N<sub>2</sub> adsorption-desorption isotherm and pore-size distribution curve of the as-prepared Cu-Co<sub>9</sub>S<sub>8</sub> rectangular NTAs.

**Table S1.** Elemental contents of the as-prepared Cu-Co<sub>9</sub>S<sub>8</sub> rectangular NTAs estimated from XPS.

| Sample                            | Cu [at.%] | Co [at.%] | S [at.%] |
|-----------------------------------|-----------|-----------|----------|
| Cu-Co <sub>9</sub> S <sub>8</sub> | 2.78      | 26.7      | 22.96    |

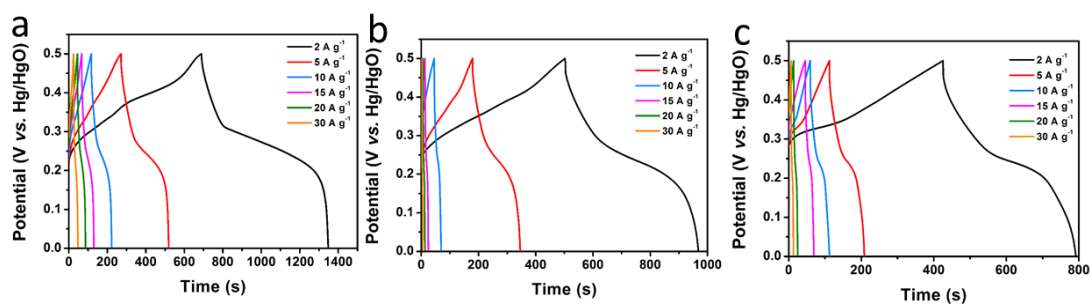

**Fig. S6** (a, b, c) GCD curves of the as-prepared Cu-Co<sub>9</sub>S<sub>8</sub> rectangular NTAs, Co<sub>9</sub>S<sub>8</sub> rectangular NTAs and Cu-Co<sub>9</sub>S<sub>8</sub> NRAs at various current densities (from 2 to 30 A g<sup>-1</sup>).



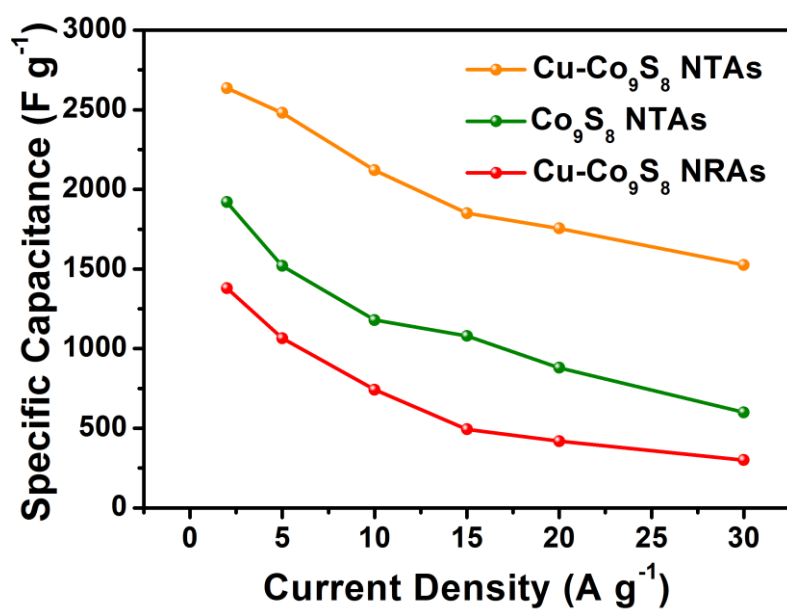

**Fig. S7** Specific capacitances at different current densities of the as-prepared Cu-Co<sub>9</sub>S<sub>8</sub> rectangular NTAs, Co<sub>9</sub>S<sub>8</sub> rectangular NTAs and Cu-Co<sub>9</sub>S<sub>8</sub> NRAs.

**Table S2.** Electrochemical performances of the different Co-based electrode materials.

| Electrode Materials                                                                        | Areal Capacitance/<br>capacity<br>(F cm <sup>2</sup> /mA h<br>cm <sup>2</sup> ) | Specific capacitance/<br>capacity<br>(F g <sup>-1</sup> /mA h g <sup>-1</sup> ) | Electrolyte                         | Stability<br>(Cycles) | References |
|--------------------------------------------------------------------------------------------|---------------------------------------------------------------------------------|---------------------------------------------------------------------------------|-------------------------------------|-----------------------|------------|
| Cu-Co <sub>9</sub> S <sub>8</sub> NTAs                                                     | 4.1 F cm <sup>-2</sup> /<br>0.57 mA h cm <sup>-2</sup>                          | 2636 F g <sup>-1</sup> /<br>366 mA h g <sup>-1</sup>                            | 6 M KOH                             | 92%<br>(5000)         | This work  |
| Co <sub>9</sub> S <sub>8</sub> /MnS@N-C<br>@MoS <sub>2</sub>                               | -                                                                               | 1938 F g <sup>-1</sup> /<br>306 mA h g <sup>-1</sup>                            | 2 M KOH                             | 86.9%<br>(10000)      | 1          |
| Multi shelled CoO<br>@Co <sub>9</sub> S <sub>8</sub>                                       | -                                                                               | 1100 F g <sup>-1</sup>                                                          | 2 M KOH                             | 83.7%<br>(15000)      | 2          |
| Co <sub>9</sub> S <sub>8</sub> @Ni(OH) <sub>2</sub>                                        | -                                                                               | 149.4 mA h g <sup>-1</sup>                                                      | 6 M KOH                             | 97.3%<br>(5000)       | 3          |
| CoS hollow cubes                                                                           | -                                                                               | 980 F g <sup>-1</sup>                                                           | 2 M KOH                             | 88%<br>(10000)        | 4          |
| CC/H-Ni@Al-Co-S                                                                            | -                                                                               | 1830 F g <sup>-1</sup>                                                          | 2 M KOH                             | 90.6%<br>(10000)      | 5          |
| Co <sub>9</sub> S <sub>8</sub> @C                                                          | -                                                                               | 1877 F g <sup>-1</sup>                                                          | 2 M KOH                             | 90%<br>(10000)        | 6          |
| Co <sub>9</sub> S <sub>8</sub> /NS-C-1.5 h                                                 | -                                                                               | 734 F g <sup>-1</sup>                                                           | 6 M KOH                             | 99.8%<br>(14000)      | 7          |
| MCO-NW@CS                                                                                  | -                                                                               | 1607.4 F g <sup>-1</sup>                                                        | 2 M KOH                             | 91.5%<br>(6000)       | 8          |
| Co <sub>9</sub> S <sub>8</sub> -NSA/NF                                                     | -                                                                               | 1098.8 F g <sup>-1</sup>                                                        | 1 M KOH                             | 87.4%<br>(1000)       | 9          |
| CuCo <sub>2</sub> S <sub>4</sub> -HNN                                                      | -                                                                               | 2163 F g <sup>-1</sup>                                                          | 3 M KOH                             | 98.7%<br>(6000)       | 10         |
| FeCo <sub>2</sub> S <sub>4</sub> -NiCo <sub>2</sub> S <sub>4</sub>                         | 3.5 F cm <sup>-2</sup>                                                          | 1519 F g <sup>-1</sup>                                                          | 3 M KOH                             | 77%<br>(3000)         | 11         |
| Co <sub>0.67</sub> Ni <sub>0.33</sub> DHs/<br>NiCo <sub>2</sub> O <sub>4</sub> /CFP        | 1.64 F cm <sup>-2</sup>                                                         | -                                                                               | 1 M KOH                             | 90%<br>(2000)         | 12         |
| 36-CSC                                                                                     | 2.35 F cm <sup>-2</sup>                                                         | -                                                                               | 3 M KOH                             | 92%<br>(2000)         | 13         |
| HO-CuCo <sub>2</sub> O <sub>4</sub>                                                        | 0.6 F cm <sup>-2</sup>                                                          | 1210 F g <sup>-1</sup>                                                          | 6 M KOH                             | 93.5%<br>(4000)       | 14         |
| NiCo <sub>2</sub> O <sub>4</sub><br>Nanosheets                                             | 3.51 F cm <sup>-2</sup>                                                         | -                                                                               | 2 M KOH                             | 93.3%<br>(3000)       | 15         |
| NiCo <sub>2</sub> O <sub>4</sub> Nanowire                                                  | 3.12 F cm <sup>-2</sup>                                                         | -                                                                               | 2 M KOH                             | 89.4%<br>(2000)       | 16         |
| ZnCo <sub>2</sub> O <sub>4</sub> @<br>Ni <sub>x</sub> Co <sub>2-x</sub> (OH) <sub>6x</sub> | 419.1 μA h cm <sup>-2</sup>                                                     | -                                                                               | 2 M KOH                             | 85.6%<br>(2000)       | 17         |
| CoSe <sub>2</sub>                                                                          | 332 mF cm <sup>-2</sup>                                                         | -                                                                               | 1 M Na <sub>2</sub> SO <sub>4</sub> | 95.4%<br>(5000)       | 18         |
| FeCo <sub>2</sub> O <sub>4</sub> tube                                                      | 1.88 F cm <sup>-2</sup>                                                         | 1254 F g <sup>-1</sup>                                                          | 3 M KOH                             | 91%<br>(5000)         | 19         |

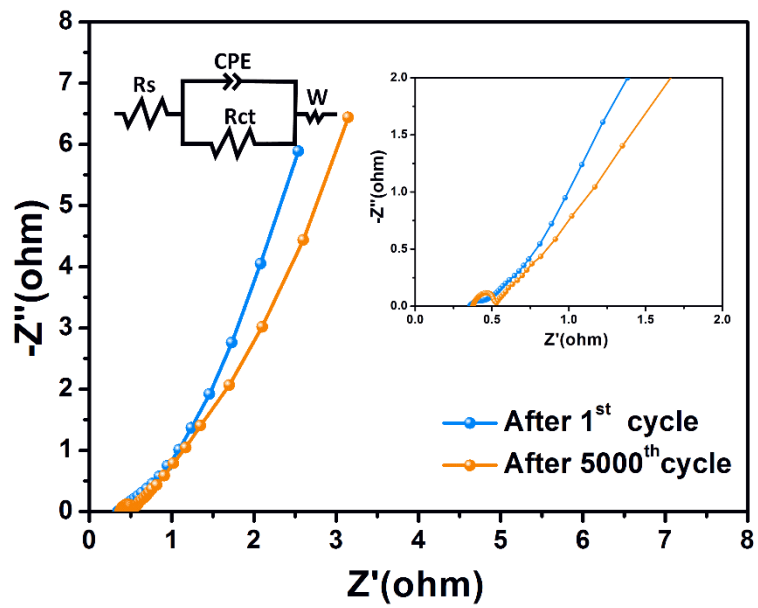

**Fig. S8** EIS of the as-prepared Cu-Co<sub>9</sub>S<sub>8</sub> rectangular NTAs electrode in three-electrode configuration (after 1<sup>st</sup> and 5000<sup>th</sup> cycling test).

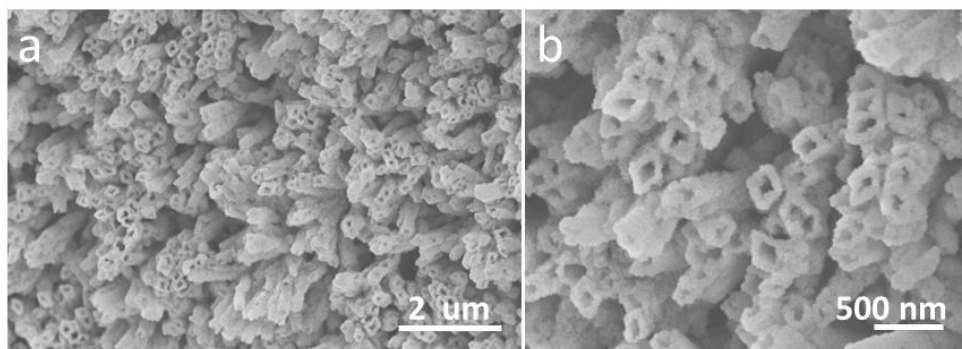

**Fig. S9** (a, b) SEM images of the as-prepared Cu-Co<sub>9</sub>S<sub>8</sub> rectangular NTAs after 5000 cycles test.

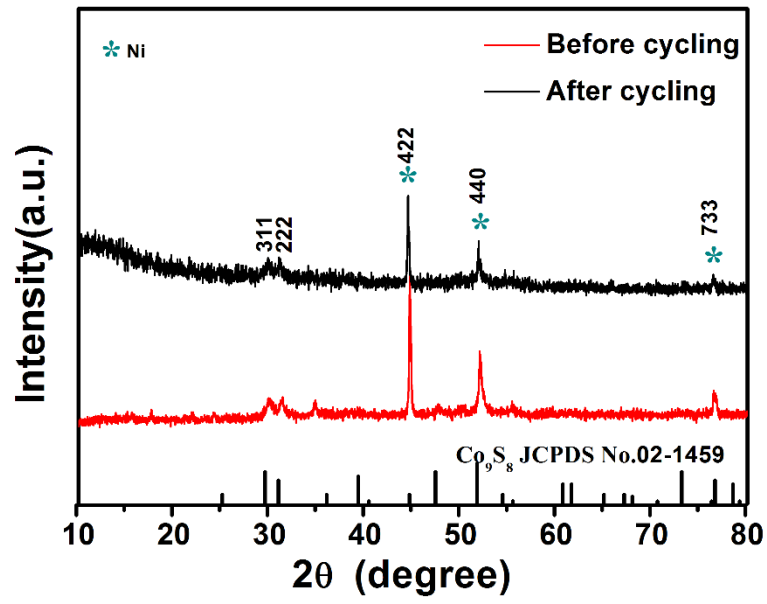

**Fig. S10** XRD pattern of the as-prepared Cu-Co<sub>9</sub>S<sub>8</sub> rectangular NTAs before and after cycling test.

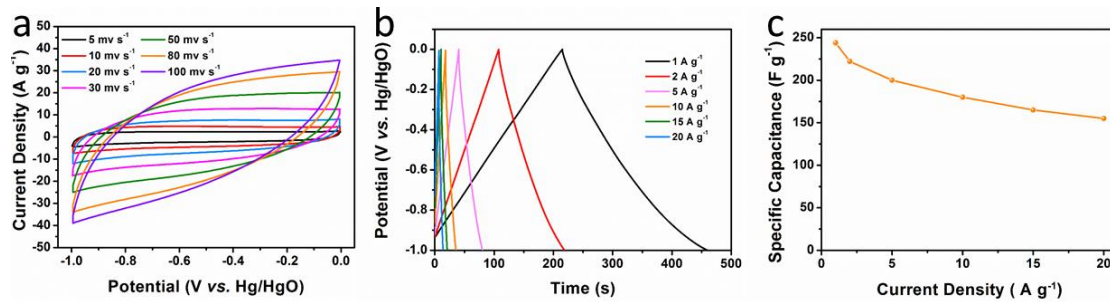

**Fig. S11** (a) CV curves, (b) GCD curves, (c) Specific capacitance of the commercial AC.

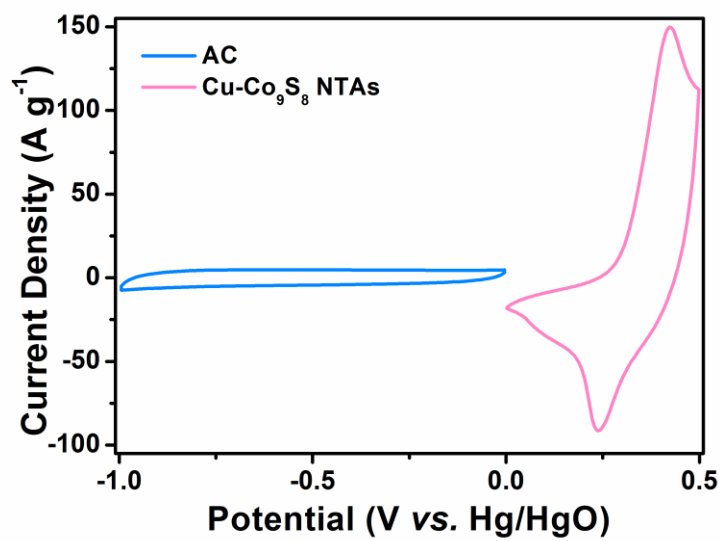

**Fig. S12** CV curves of the commercial AC and the as-prepared Cu-Co<sub>9</sub>S<sub>8</sub> rectangular NTAs.

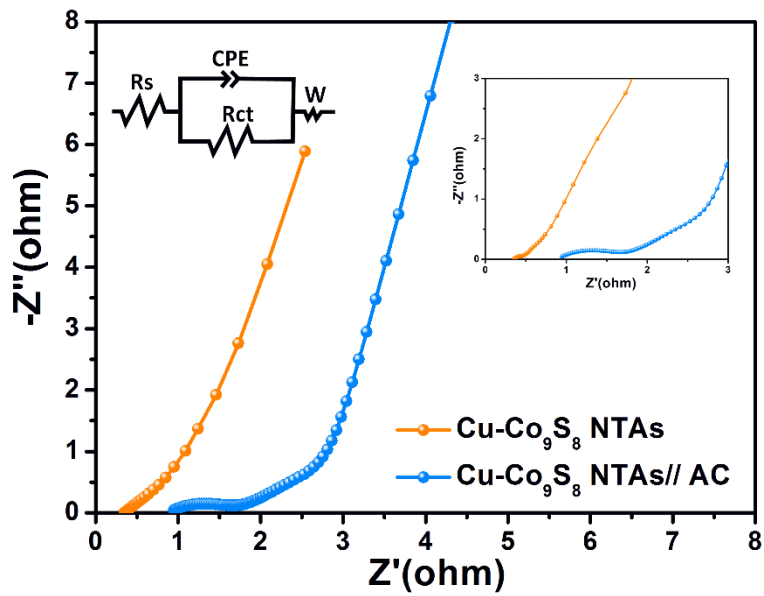

**Fig. S13** EIS of the as-prepared Cu-Co<sub>9</sub>S<sub>8</sub> and Cu-Co<sub>9</sub>S<sub>8</sub>//AC ASC device.



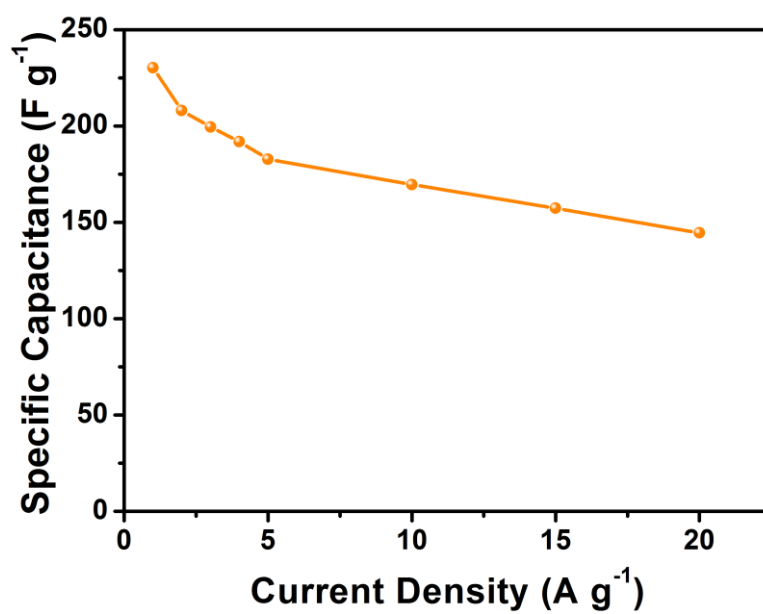

**Fig. S14** Specific capacitance of the as-prepared Cu-Co<sub>9</sub>S<sub>8</sub> rectangular NTAs at different current densities.

**Table S3.** ASC device properties comparison with the reported literature.

| Electrode Materials                                                                                   | Areal Capacitance/capacity (F cm <sup>-2</sup> /mA h cm <sup>-2</sup> ) | Specific capacitance (F g <sup>-1</sup> ) | Electrolyte | Stability (Cycles) | References |
|-------------------------------------------------------------------------------------------------------|-------------------------------------------------------------------------|-------------------------------------------|-------------|--------------------|------------|
| Cu-Co <sub>9</sub> S <sub>8</sub> NTAs//AC                                                            | 2.42 F cm <sup>-2</sup>                                                 | 230                                       | PVA/KOH     | 96.2%<br>(5000)    | This work  |
| CoO/Co <sub>9</sub> S <sub>8</sub> //AC                                                               | -                                                                       | 73                                        | 2 M KOH     | 95.27%<br>(5000)   | 2          |
| CC/H-Ni@Al-Co-S//graphene/CNT                                                                         | -                                                                       | 159                                       | PVA/KOH     | 90.6%<br>(10000)   | 5          |
| Co <sub>9</sub> S <sub>8</sub> @C//AC                                                                 | -                                                                       | 166                                       | 2 M KOH     | 86%<br>(10000)     | 6          |
| CuCo <sub>2</sub> O <sub>4</sub> /MnCo <sub>2</sub> O <sub>4</sub> //graphene/NF                      | -                                                                       | 118.4                                     | 2 M KOH     | 88.4%<br>(10000)   | 21         |
| Co <sub>9</sub> S <sub>8</sub> -NSA//AC                                                               | -                                                                       | 52.7                                      | 1 M KOH     | 84.4%<br>(1000)    | 9          |
| CuCo <sub>2</sub> S <sub>4</sub> -HNN//AC                                                             | -                                                                       | 124                                       | 3 M KOH     | 94.1%<br>(6000)    | 10         |
| NiCo <sub>2</sub> O <sub>4</sub> //FeSe <sub>2</sub>                                                  | -                                                                       | 71.7                                      | 2 M KOH     | 90%<br>(1000)      | 20         |
| Co <sub>9</sub> S <sub>8</sub> /NS-C-1.5 h//AC                                                        | -                                                                       | 75.59                                     | 6 M KOH     | 99.5%<br>(2000)    | 7          |
| MnCo <sub>2</sub> O <sub>4</sub> @Ni(OH) <sub>2</sub> //AC                                            | -                                                                       | 141                                       | 2 M KOH     | 90%<br>(2500)      | 22         |
| H-NiCoSe <sub>2</sub> //AC                                                                            | -                                                                       | 112                                       | 6 M KOH     | 82.3%<br>(5200)    | 23         |
| Co <sub>3</sub> O <sub>4</sub> @NiCo <sub>2</sub> O <sub>4</sub> //AC                                 | 1343.7 mF cm <sup>-2</sup>                                              | -                                         | PVA/KOH     | 98.5%<br>(5000)    | 24         |
| Co <sub>3</sub> O <sub>4</sub> @C@Ni <sub>3</sub> S <sub>2</sub> //AC                                 | 0.52 F cm <sup>-2</sup>                                                 | -                                         | PVA/KOH     | 91.43%<br>(10000)  | 25         |
| NiCo <sub>2</sub> O <sub>4</sub> @Co <sub>0.33</sub> Ni <sub>0.67</sub> (OH) <sub>2</sub> //CMK-3-ASC | 887.5 mF cm <sup>-2</sup>                                               | -                                         | 1 M KOH     | 82%<br>(3000)      | 26         |
| Co(OH) <sub>2</sub> @CW//CW                                                                           | 2.2 F cm <sup>-2</sup>                                                  | -                                         | PVA/KOH     | 85%<br>(10000)     | 27         |
| NiCo <sub>2</sub> S <sub>4</sub> //C                                                                  | 341 mF cm <sup>-2</sup>                                                 | -                                         | 6 M KOH     | -                  | 28         |
| Cu <sub>3</sub> N@CoFe-LDH//AC                                                                        | 1190 mF cm <sup>-2</sup>                                                | -                                         | 2 M KOH     | 92.6%<br>(10000)   | 29         |
| MnO <sub>2</sub> FeCo <sub>2</sub> O <sub>4</sub> //AC                                                | 2.52 F cm <sup>-2</sup>                                                 | -                                         | PVA/KOH     | 94%<br>(1500)      | 30         |

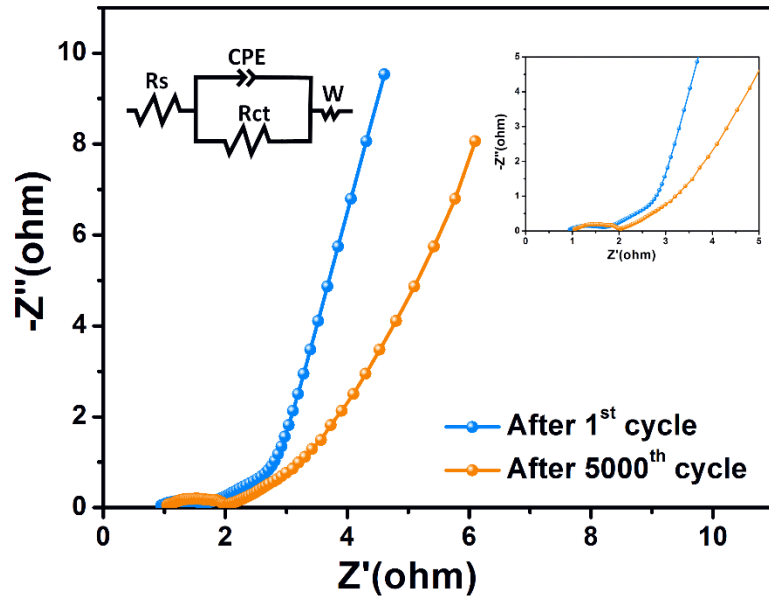

**Fig. S15** EIS of the as-prepared ASC device (after 1st and 5000th cycling test).

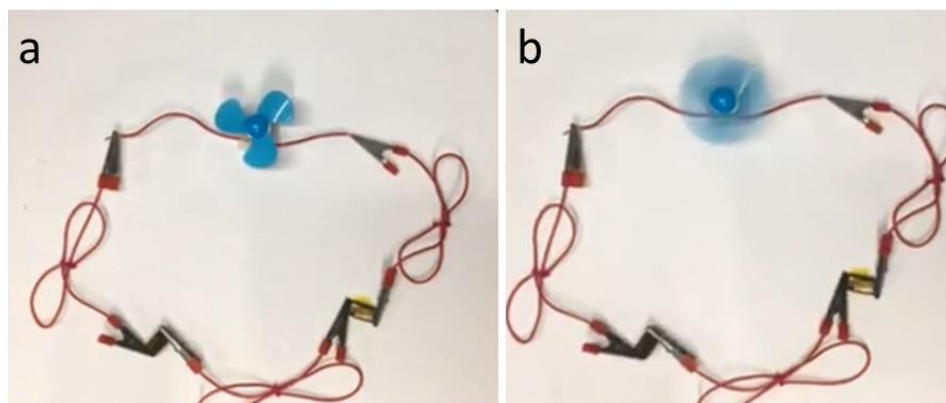

**Fig. S16** (a, b) The photographic images of an electric motor fan driven by two Cu-Co<sub>9</sub>S<sub>8</sub> NTAs//AC ASCs in series.

## References

- 1 S. Kandula, K. R. Shrestha, N. H. Kim and J. H. Lee, *Small*, 2018, **14**, 1800291.
- 2 Y. Wang, T. Zhu, Y. Zhang, X. Kong, S. Liang, G. Cao and A. Pan, *J. Mater. Chem. A*, 2017, **5**, 18448.
- 3 F. Zhu, M. Yan, Y. Liu, H. Shen, Y. Lei and W. Shi, *J. Mater. Chem. A*, 2017, **5**, 22782.
- 4 H. Hu, B. Y. Guan and X. W. Lou, *Chem*, 2016, **1**, 102.
- 5 J. Huang, J. Wei, Y. Xiao, Y. Xu, Y. Xiao, Y. Wang, L. Tan, K. Yuan and Y. Chen, *ACS Nano*, 2018, **12**, 3030.
- 6 S. Sun, J. Luo, Y. Qian, Y. Jin, Y. Liu, Y. Qiu, X. Li, C. Fang, J. Han and Y. Huang, *Adv. Energy Mater.*, 2018, **8**, 1801080.
- 7 S. Zhang, D. Li, S. Chen, X. Yang, X. Zhao, Q. Zhao, S. Komarneni and D. Yang, *J. Mater. Chem. A*, 2017, **5**, 12453.
- 8 G. Liu, B. Wang, T. Liu, L. Wang, H. Luo, T. Gao, F. Wang, A. Liu and D. Wang, *J. Mater. Chem. A*, 2018, **6**, 1822.
- 9 X. Han, K. Tao, D. Wang and L. Han, *Nanoscale*, 2018, **10**, 2735.
- 10 S. E. Moosavifard, S. Fani and M. Rahmanian, *Chem. Commun.*, 2016, **52**, 4517.
- 11 J. Zhu, S. Tang, J. Wu, X. Shi, B. Zhu and X. Meng, *Adv. Energy Mater.*, 2017, **7**, 1601234.
- 12 L. Huang, D. Chen, Y. Ding, S. Feng, Z. L. Wang and M. Liu, *Nano Lett.*, 2013, **13**, 3135.
- 13 J. Xu, Q. Wang, X. Wang, Q. Xiang, B. Liang, D. Chen and G. Shen, *ACS Nano*, 2013, **7**, 5453.
- 14 A. Pendashteh, S. E. Moosavifard, M. S. Rahmanifar, Y. Wang, M. F. El-Kady, R. B. Kaner and M. F. Mousavi, *Chem. Mater.*, 2015, **27**, 3919.
- 15 G. Zhang and X. W. Lou, *Adv. Mater.*, 2013, **25**, 976.
- 16 G. Q. Zhang, H. B. Wu, H. E. Hoster, M. B. Chan-Park and X. W. Lou, *Energy Environ. Sci.*, 2012, **5**, 9453.
- 17 W. Fu, Y. Wang, W. Han, Z. Zhang, H. Zha and E. Xie, *J. Mater. Chem. A*, 2016, **4**, 173.
- 18 N. Yu, M. Q. Zhu and D. Chen, *J. Mater. Chem. A*, 2015, **3**, 7910.
- 19 B. Zhu, S. Tang, S. Vongehr, H. Xie, J. Zhu and X. Meng, *Chem. Commun.*, 2016, **52**, 2624.
- 20 C. Ji, F. Liu, L. Xu and S. Yang, *J. Mater. Chem. A*, 2017, **5**, 5568.

- 21 S. Liu, K. San Hui, K. N. Hui, J. M. Yun and K. H. Kim, *J. Mater. Chem. A*, 2016, **4**, 8061.
- 22 Y. Zhao, L. Hu, S. Zhao and L. Wu, *Adv. Funct. Mater.*, 2016, **26**, 4085.
- 23 L. Hou, Y. Shi, C. Wu, Y. Zhang, Y. Ma, X. Sun, J. Sun, X. Zhang and C. Yuan, *Adv. Funct. Mater.*, 2018, **28**, 1705921.
- 24 Y. Lu, L. Li, D. Chen and G. Shen, *J. Mater. Chem. A*, 2017, **5**, 24981.
- 25 D. Kong, C. Cheng, Y. Wang, J. I. Wong, Y. Yang and H. Y. Yang, *J. Mater. Chem. A*, 2015, **3**, 16150.
- 26 K. Xu, R. Zou, W. Li, Q. Liu, X. Liu, L. An and J. Hu, *J. Mater. Chem. A*, 2014, **2**, 10090.
- 27 Y. Wang, X. Lin, T. Liu, H. Chen, S. Chen, Z. Jiang, J. Liu, J. Huang and M. Liu, *Adv. Funct. Mater.*, 2018, **28**, 1806207.
- 28 W. Kong, C. Lu, W. Zhang, J. Pu and Z. Wang, *J. Mater. Chem. A*, 2015, **3**, 12452.
- 29 X. Zhou, X. Li, D. Chen, D. Zhao and X. Huang, *J. Mater. Chem. A*, 2018, **6**, 24603.
- 30 B. Zhu, S. Tang, S. Vongehr, H. Xie and X. Meng, *ACS Appl. Mater. Inter.* 2016, **8**, 4762.
